# Supplementary material
Source: PubMed Central journal article supplement (PMC4450108)
Supplement: NIHMS648747-supplement-40262_2014_221_MOESM1_ESM.pdf [file NIHMS648747-supplement-40262_2014_221_MOESM1_ESM.pdf]

## Online Resource 1

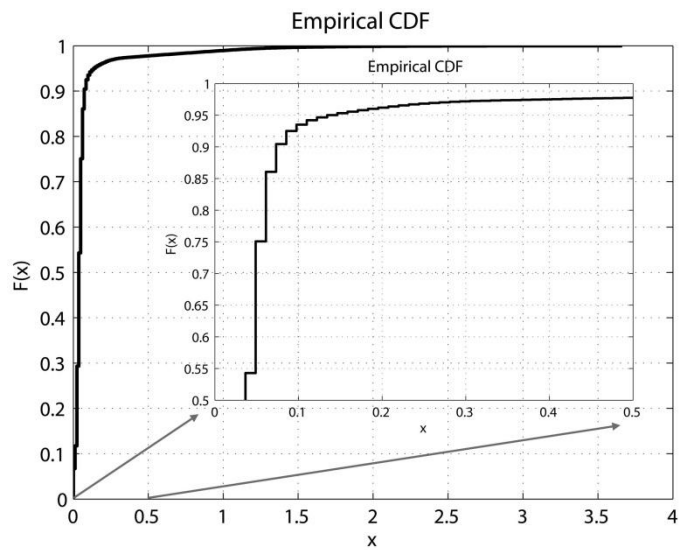

**Fig S1.** Empirical cumulative distribution function (CDF) for the airflow data (with no negative values).  $X$  axis represents the airflow possible values).
