# Supplementary material
Source: PubMed Central journal article supplement (PMC4450108)
Supplement: NIHMS648747-supplement-40262_2014_221_MOESM2_ESM.pdf [file NIHMS648747-supplement-40262_2014_221_MOESM2_ESM.pdf]

## Online Resource 2

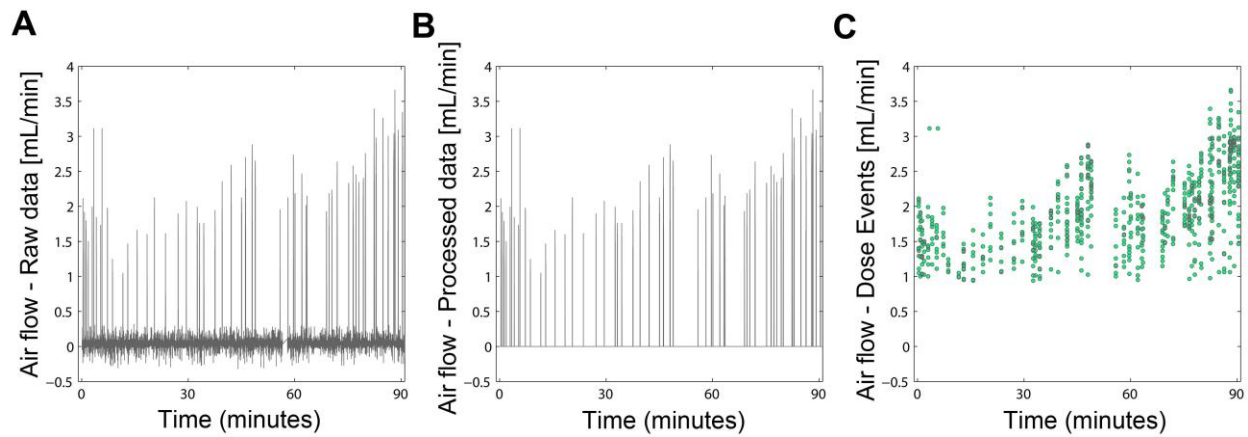

**Fig S2. A. One individual airflow: Raw data. B. Processed airflow for the individual.** The processing was developed in three consecutive steps: (i) Every negative value was transformed to zero; (ii) the 97.5th percentile was calculated based on all subjects; (iii) Every value below such percentile was transformed to zero. **C. Dose events calculated based on the processed airflow.** The dose events and their intensities were defined as processed airflow recordings bigger than zero (see methods for more details).
