# Supplementary material
Source: PubMed Central journal article supplement (PMC4450108)
Supplement: NIHMS648747-supplement-40262_2014_221_MOESM3_ESM.pdf [file NIHMS648747-supplement-40262_2014_221_MOESM3_ESM.pdf]

### Online Resource 3: NONMEM control stream

```
$SIZES LIM6=5000
$PROBLEM PK NICOTINE (AND COTININE)
$INPUT ID TIME DV CMT AMT EVID BQL WT CO
; TIME (minutes)
; AMT is not real amount of drug. AMT is the airflow values after processing.
; We assumed the real amount is proportional.
; F to scale the dose
$SUBROUTINES ADVAN13 TOL=6
$MODEL
    COMP(PARENT)          ; 1 CENTRAL CMT nicotine
    COMP(MET1)            ; 2 METABOLITE 1 cotinine (COT)

$PK
; nicotine original juice (18mg/mL)
F1=18*THETA(1)*EXP(ETA(1)) ; Bioavailability (Prop factor Airflow -> real dose)
VC=THETA(2)*EXP(ETA(2))    ; V CENTRAL NICOTINE(L) fix from the literature
VM=THETA(3)*EXP(ETA(3))    ; V CENTRAL COTININE(L) fix from the literature

; CLtotal NICOTINE CLEARANCE(L/min) = CLEX + CL2COT + CL2METO
CLEX =THETA(4)*EXP(ETA(4)) ; Fix from literature
CL2COT = THETA(5)*EXP(ETA(5)) ; Fix from literature
CLCOT= THETA(6)*EXP(ETA(6)) ; Fix from literature

; Initialization
A_0(1)=((1+CO)**THETA(12))*THETA(8)*EXP(ETA(8))
A_0(2)=((1+CO)**THETA(13))*THETA(9)*EXP(ETA(9))
;----- scales -----
S1=VC          ;AMT= arbitrary units in micrograms, DV= ng/mL (==microg/L)
S2=VM

$DES
;-----pk ODEs Morphine-----
DADT(2) = - (CLEX/VC)*A(1) - (CL2COT/VC)*A(1) ; Nicotine
DADT(3) = (CL2COT/VC)*A(1) - (CLCOT/VM)*A(2) ; Cotinine
....
```
